# Supplementary material for: <em>Dirofilaria</em> sp. and Blood Meal Analysis in Mosquitoes Collected in Vojvodina and Mačva, and the First Report of<em> Setaria tundra</em> (Issaitshikoff &Amp; Rajewskaya, 1928) in Serbia
Source: Preprints.org preprint supplement (doi:10.20944/preprints202404.0715.v1), 2024-04-11
Supplement: Supplementary file 1 [file supplementary]

## Sheet: All locations
No	Location	Latitude	Longitude
1	Starcevo	44.810980	20.694780
2	Starcevo	44.804737	20.691096
3	Pancevo	44.867029	20.653822
4	Jabuka	44.947624	20.585016
5	Jabuka	44.946417	20.606634
6	Glogonj	44.991909	20.514506
7	Sefkerin	45.006740	20.470460
8	Sefkerin	45.000675	20.494024
9	Opovo	45.053365	20.417830
10	Opovo	45.045172	20.430594
11	Perlez	45.215019	20.372052
12	Perlez	45.215243	20.385334
13	Ecka	45.311432	20.447702
14	Ecka	45.311079	20.423453
15	Zrenjanin	45.359569	20.391080
16	Zrenjanin	45.386306	20.413639
17	Melenci	45.528139	20.304444
18	Melenci	45.511735	20.305917
19	Novi Becej	45.597078	20.141144
20	Novi Becej	45.581111	20.143699
21	Becej	45.612937	20.022146
22	Backa Topola	45.827403	19.631602
23	Backa Topola	45.859583	19.634000
24	Mali Idjos	45.709719	19.653719
25	Mali Idjos	45.701111	19.679061
26	Lovcenac	45.679950	19.681450
27	Feketic	45.658136	19.709208
28	Srbobran	45.537690	19.786532
29	Sirig	45.444940	19.816372
30	Cenej	45.361843	19.843538
31	Temerin	45.391624	19.858687
32	Palic	46.099172	19.755222
33	Subotica	46.080117	19.676158
34	Subotica	46.089969	19.639352
35	Bajmok	45.979106	19.414500
36	Aleksa Santic	45.923389	19.331687
37	Svetozar Miletic	45.857961	19.210842
38	Conoplja	45.813258	19.240646
39	Kljajicevo	45.767415	19.294542
40	Sombor	45.755889	19.098878
41	Apatin	45.668838	18.992625
42	Banja Junakovic	45.677845	19.033797
43	Sonta	45.606516	19.112827
44	Karavukovo	45.504476	19.186435
45	Odzaci	45.503035	19.251484
46	Parage	45.414863	19.402898
47	Backi Maglic	45.369323	19.536340
48	Rumenka	45.289375	19.745317
49	Novi Sad	45.265159	19.814186
50	Novi Sad	45.242379	19.821240
51	Inđija	45.056233	20.066667
52	Stara Pazova	44.986667	20.159250
53	Petrovaradin	45.247700	19.878350
54	Bukovac	45.225067	19.886367
55	Ruma	45.034486	19.819215
56	Hrtkovci	44.873850	19.761250
57	Sremska Mitrovica	44.974817	19.591767
58	Kuzmin	45.023233	19.408933
59	Batrovci	45.047225	19.106996
60	Morović	45.014217	19.227017
61	Basaid	45.633867	20.413467
62	Kikinda	45.802600	20.447417
63	Idjos	45.834543	20.313649
64	Coka	45.936200	20.102600
65	Kanjiza	46.060050	20.060183
66	Banja Koviljaca	44.518111	19.144457
67	Loznica	44.541653	19.236389
68	Loznica ep belt	44.529861	19.207236
69	Loznicko polje	44.575070	19.212867
70	Loznica crkva	44.530616	19.218726
71	Lipnicki Sor	44.604904	19.229038
72	Novi Sad/Centar	45.2514	19.8456
73	Lesnica	44.646702	19.294131

## Sheet: non-bloodfed
				Aedes vexans						Aedes caspius						Aedes albopictus								Anopheles maculipennis
				8-24.June	21-29.July	14-17.Aug	24-28.Aug	13-21.Sept	27.Sept-1.Oct	8-24.June	21-29.July	14-17.Aug	24-28.Aug	13-21.Sept	27.Sept-1.Oct	8-24.June	21-29.July	14-17.Aug	24-28.Aug	13-21.Sept	27.Sept-1.Oct	2022-07-01	2022-08-01	8-24.June	21-29.July	14-17.Aug	24-28.Aug	13-21.Sept	27.Sept-1.Oct
	Location	Latitude	Longitude	1	2	3	4	5	6	1	2	3	4	5	6	1	2	3	4	5	6			1	2	3	4	5	6	Total
1	Starcevo	44.810980	20.694780							1					1															2
2	Starcevo	44.804737	20.691096	9																				3	2		2		1	17
3	Pancevo	44.867029	20.653822			3								2				2		1										8
4	Jabuka	44.947624	20.585016		13	26	12	2	5			1													6	13	18			96
5	Jabuka	44.946417	20.606634				8	14	6		1		3		7									15	27		64	6	6	157
6	Glogonj	44.991909	20.514506		3	15	6	1	3			3			4			1						4			1			41
7	Sefkerin	45.006740	20.470460	1	10	8	2						1												1	1				24
8	Sefkerin	45.000675	20.494024	100	4	11	2					2												41	1	2	1			164
9	Opovo	45.053365	20.417830			20	19	1			1			3														1		45
10	Opovo	45.045172	20.430594		10	24	5					6												7	1	1	2	1		57
11	Perlez	45.215019	20.372052	3		68	4		2			4	3																	84
12	Perlez	45.215243	20.385334		6	1	9		1		1													1						19
13	Ecka	45.311432	20.447702		1			1		3														1						6
14	Ecka	45.311079	20.423453		21	3	2		3					18											4	1				52
15	Zrenjanin	45.359569	20.391080	3		1				12		10																		26
16	Zrenjanin	45.386306	20.413639		10	2	1		1	1			2												6			1		24
17	Melenci	45.528139	20.304444	21		2			1																				2	26
18	Melenci	45.511735	20.305917	8						4																				12
19	Novi Becej	45.597078	20.141144		2						1																			3
20	Novi Becej	45.581111	20.143699	14	4	3				3	4				1															29
21	Becej	45.612937	20.022146							1		1																		2
22	Backa Topola	45.827403	19.631602		1	9	5			7																				22
23	Backa Topola	45.859583	19.634000		1	3				1			1														1			7
24	Mali Idjos	45.709719	19.653719	7						6	1	2																		16
25	Mali Idjos	45.701111	19.679061		2	2		1				1	1													1				8
26	Lovcenac	45.679950	19.681450	6			3			4		2																		15
27	Feketic	45.658136	19.709208					1						2																3
28	Srbobran	45.537690	19.786532		1	8				1			4												1		1			16
29	Sirig	45.444940	19.816372		2	13							1	4												2				22
30	Cenej	45.361843	19.843538	3								8	2																	13
31	Temerin	45.391624	19.858687	95			3	1				3		14										1						117
32	Palic	46.099172	19.755222		4					3	1																			8
33	Subotica	46.080117	19.676158			3	1			4	1	1		6																16
34	Subotica	46.089969	19.639352	3						1																				4
35	Bajmok	45.979106	19.414500	4		2						1																		7
36	Aleksa Santic	45.923389	19.331687							2																				2
37	Svetozar Miletic	45.857961	19.210842																											0
38	Conoplja	45.813258	19.240646							4																				4
39	Kljajicevo	45.767415	19.294542		4	19																								23
40	Sombor	45.755889	19.098878				6	3				3												1						13
41	Apatin	45.668838	18.992625	100				3					3				1	1	1	1				1						111
42	Banja Junakovic	45.677845	19.033797						8					1						1										10
43	Sonta	45.606516	19.112827					34				4	2											5	6	3	1			55
44	Karavukovo	45.504476	19.186435	1						9			7	10												1				28
45	Odzaci	45.503035	19.251484					3					2												3					8
46	Parage	45.414863	19.402898	15		7	2			10		2																		36
47	Backi Maglic	45.369323	19.536340		2	13	6				1														1					23
48	Rumenka	45.289375	19.745317		11		2	1		2	8	10					1	1		2										38
49	Novi Sad	45.265159	19.814186																											0
50	Novi Sad	45.242379	19.821240	4		1	2			1		1		1				8		11	1									30
51	Inđija	45.056233	20.066667			23				6		2																		31
52	Stara Pazova	44.986667	20.159250	8		1																								9
53	Petrovaradin	45.247700	19.878350			2				1														1	4	1				9
54	Bukovac	45.225067	19.886367	7	2					1		1																		11
55	Ruma	45.034486	19.819215	13		3	1	1																						18
56	Hrtkovci	44.873850	19.761250	2	5	7																					1			15
57	Sremska Mitrovica	44.974817	19.591767		10		2	1																1						14
58	Kuzmin	45.023233	19.408933		2				1	1								1			1									6
59	Batrovci	45.047225	19.106996				12	2										2		4				1		1	1			23
60	Morović	45.014217	19.227017			4				3														8		2				17
61	Basaid	45.633867	20.413467	17	2					4		1	2											28	14	3	6			77
62	Kikinda	45.802600	20.447417	4	2	2																		3		1				12
63	Idjos	45.834543	20.313649	4		2	1		4	3	1	1														3				19
64	Coka	45.936200	20.102600	12	9		3			3														1	1					29
65	Kanjiza	46.060050	20.060183			20	5			2		1																		28
66	Banja Koviljaca			14																										14
67	Loznica			22																				1						23
68	Loznica ep belt																			5			5							10
69	Loznicko polje																					8	7	12						27
70	Loznica crkva																						3							3
71	Lipnicki Sor			27																			10	8				1		46
72	Novi Sad/Centar																						489							489
73	Lesnica			22						1												5	7	6				1		42
Total				549	144	331	124	70	35	105	21	71	34	61	13	0	2	16	1	25	2	13	521	150	78	36	99	11	9	2521

## Sheet: bloodfed
				Aedes vexans								Aedes caspius								Aedes sticticus						Anopheles maculipennis							Culex pipiens									Culiseta annulata							Coquillettidia richiardii
				2021						2022		2021						2022		2021						2021						2022	2021						2022			2021						2022	2021
				8-24.June	21-29.July	14-17.Aug	24-28.Aug	13-21.Sept	27.Sept-1.Oct	7-14.May	1-3.July	8-24.June	21-29.July	14-17.Aug	24-28.Aug	13-21.Sept	27.Sept-1.Oct	7-14.May	1-3.July	8-24.June	21-29.July	14-17.Aug	24-28.Aug	13-21.Sept	27.Sept-1.Oct	8-24.June	21-29.July	14-17.Aug	24-28.Aug	13-21.Sept	27.Sept-1.Oct	1-3.July	8-24.June	21-29.July	14-17.Aug	24-28.Aug	13-21.Sept	27.Sept-1.Oct	7-14.May	6-12.June	1-3.July	8-24.June	21-29.July	14-17.Aug	24-28.Aug	13-21.Sept	27.Sept-1.Oct	6-12.June	8-24.June
	Location	Latitude	Longitude	1	2	3	4	5	6			1	2	3	4	5	6			1	2	3	4	5	6	1	2	3	4	5	6		1	2	3	4	5	6				1	2	3	4	5	6		1
1	Starcevo	44.810980	20.694780																															1							7
2	Starcevo	44.804737	20.691096	6								1								1						3		2							2						3	4							6
3	Pancevo	44.867029	20.653822																															1	2		2			8	20
4	Jabuka	44.947624	20.585016	2	6					1																			1			1								2	1				1
5	Jabuka	44.946417	20.606634		1																					1								6	3
6	Glogonj	44.991909	20.514506									1						1																1	1						2
7	Sefkerin	45.006740	20.470460																															1							1
8	Sefkerin	45.000675	20.494024	4																								1							1	6
9	Opovo	45.053365	20.417830
10	Opovo	45.045172	20.430594	3																6														1							1
11	Perlez	45.215019	20.372052	4		1		2	1																			2
12	Perlez	45.215243	20.385334	5					1									1
13	Ecka	45.311432	20.447702										1
14	Ecka	45.311079	20.423453																1													1		1
15	Zrenjanin	45.359569	20.391080																														3	1	2	1				6
16	Zrenjanin	45.386306	20.413639																								1										1			2
17	Melenci	45.528139	20.304444	3																													1	2	1		1				1
18	Melenci	45.511735	20.305917
19	Novi Becej	45.597078	20.141144																																1					4	3
20	Novi Becej	45.581111	20.143699																																1					1	2
21	Becej	45.612937	20.022146																																					3	1							1
22	Backa Topola	45.827403	19.631602	2																																1					1
23	Backa Topola	45.859583	19.634000																																					1
24	Mali Idjos	45.709719	19.653719	1																													4	2	1					2	1
25	Mali Idjos	45.701111	19.679061																															1		7					4
26	Lovcenac	45.679950	19.681450																															1	1
27	Feketic	45.658136	19.709208																																	4					2
28	Srbobran	45.537690	19.786532																															1		7	1				3
29	Sirig	45.444940	19.816372
30	Cenej	45.361843	19.843538																															2	1	2
31	Temerin	45.391624	19.858687							1																										2	1
32	Palic	46.099172	19.755222	3																1														1							3
33	Subotica	46.080117	19.676158	1																																													1
34	Subotica	46.089969	19.639352
35	Bajmok	45.979106	19.414500																																	4					4
36	Aleksa Santic	45.923389	19.331687								1																														1
37	Svetozar Miletic	45.857961	19.210842																															1
38	Conoplja	45.813258	19.240646	2																																					2
39	Kljajicevo	45.767415	19.294542	3																														3		4				1									1
40	Sombor	45.755889	19.098878	3				1					1
41	Apatin	45.668838	18.992625	6
42	Banja Junakovic	45.677845	19.033797					1																											1				6
43	Sonta	45.606516	19.112827		8	7	2			1				3																					2	1
44	Karavukovo	45.504476	19.186435
45	Odzaci	45.503035	19.251484		1																													2	1
46	Parage	45.414863	19.402898
47	Backi Maglic	45.369323	19.536340																														3	2		3
48	Rumenka	45.289375	19.745317																															1			1
49	Novi Sad	45.265159	19.814186
50	Novi Sad	45.242379	19.821240
51	Inđija	45.056233	20.066667
52	Stara Pazova	44.986667	20.159250
53	Petrovaradin	45.247700	19.878350
54	Bukovac	45.225067	19.886367
55	Ruma	45.034486	19.819215
56	Hrtkovci	44.873850	19.761250																															3									1
57	Sremska Mitrovica	44.974817	19.591767
58	Kuzmin	45.023233	19.408933																															2
59	Batrovci	45.047225	19.106996
60	Morović	45.014217	19.227017	1																													2							3
61	Basaid	45.633867	20.413467	1																						1																							4
62	Kikinda	45.802600	20.447417																														1
63	Idjos	45.834543	20.313649																														1
64	Coka	45.936200	20.102600										1																												1
65	Kanjiza	46.060050	20.060183																														1	1
66	Banja Koviljaca
67	Loznica
68	Loznica ep belt
69	Loznicko polje																																				1
70	Loznica crkva
71	Lipnicki Sor																																				1
72	Novi Sad/Centar
73	Lesnica			1																						1
Total				51	16	8	2	4	2	3	1	2	3	3	0	0	0	2	1	8	0	0	0	0	0	6	1	5	1	0	0	2	16	38	21	42	9	0	6	33	64	4	1	0	1	0	0	1	12
[truncated: 9 more columns]
